# Supplementary material for: An ICT-based organic framework for the fluorogenic detection of lethal pulmonary agent phosgene
Source: Royal Society of Chemistry journal article supplement (doi:10.1039/d3nj02580b), 2023-01-01
Supplement: d3nj02580b1.pdf [file d3nj02580b1.pdf]

# **An ICT based organic framework for fluorogenic detection of lethal**

## **pulmonary agent phosgene**

Amitav Biswas, Atanu Maji, Saswati Gharami and Tapan Kumar Mondal\*

*Department of Chemistry, Jadavpur University, Kolkata-700 032, India.*

*E-mail: [tapank.mondal@jadavpuruniversity.in](mailto:tapank.mondal@jadavpuruniversity.in)*

## **CONTENTS**

1. Determination of detection limit (LOD).....
2. UV-vis and fluorescence spectra.....
3. Competition study.....
4. Determination of Quantum yield.....
5. <sup>1</sup>H NMR of BPCI .....
6. <sup>13</sup>C NMR of BPCI.....
7. HRMS spectra of BPCI.....
8. IR spectra of the probe BPCI.....
9. <sup>1</sup>H NMR spectra of BPCI-PHOS.....
10. <sup>13</sup>C NMR of BPCI-PHOS.....
11. HRMS spectra of BPCI-PHOS.....
12. Computational study.....
13. Comparison table.....

## 1. Determination of detection limit (LOD)

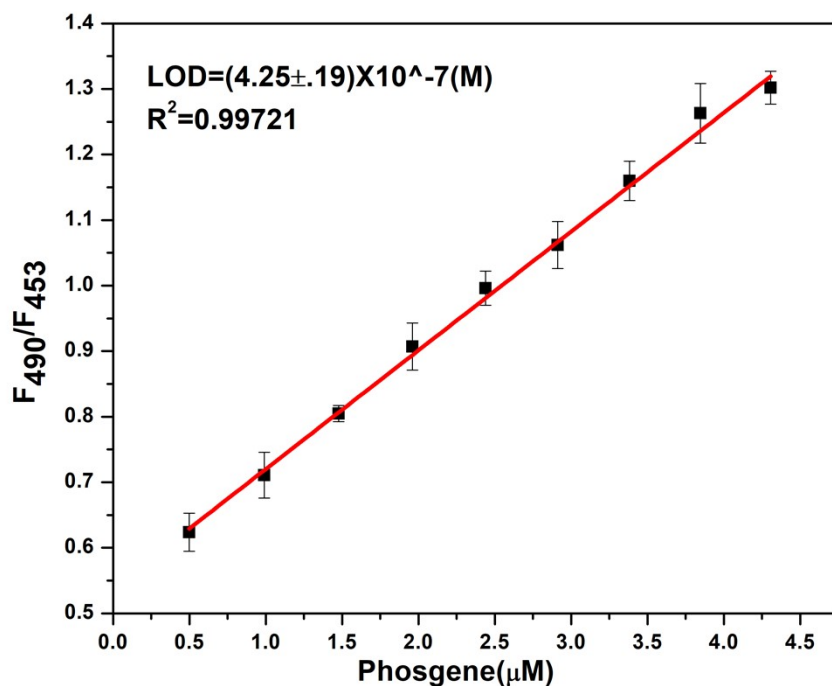

**Figure S1:** The linear response curve of emission intensity ratio ( $F_{490}/F_{453}$ ) of BPCI as a function of phosgene concentration ( $\lambda_{\text{ex}} = 360\text{nm}$ ).

## 2. UV-vis and fluorescence spectra

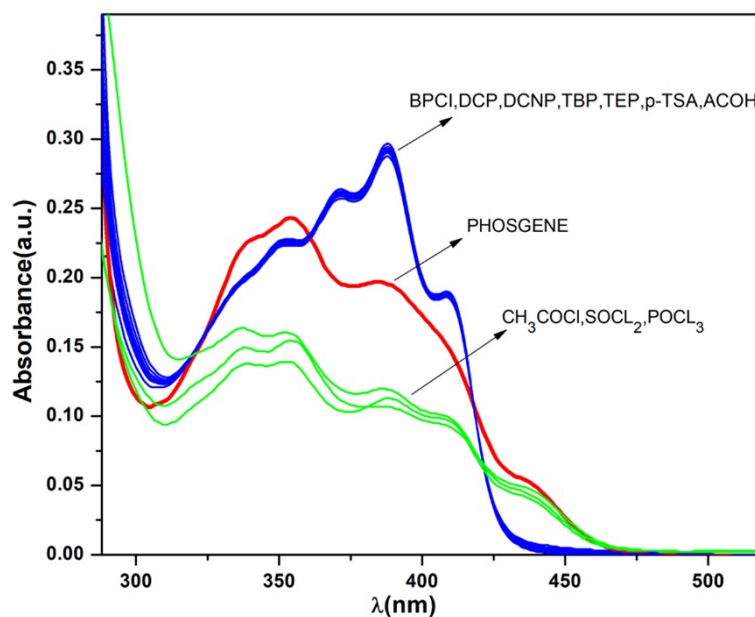

**Figure S2:** Change in absorption spectrum of BPCI ( $10 \mu\text{M}$ ) upon addition of different guest analytes ( $20 \mu\text{M}$ ) in THF solution.

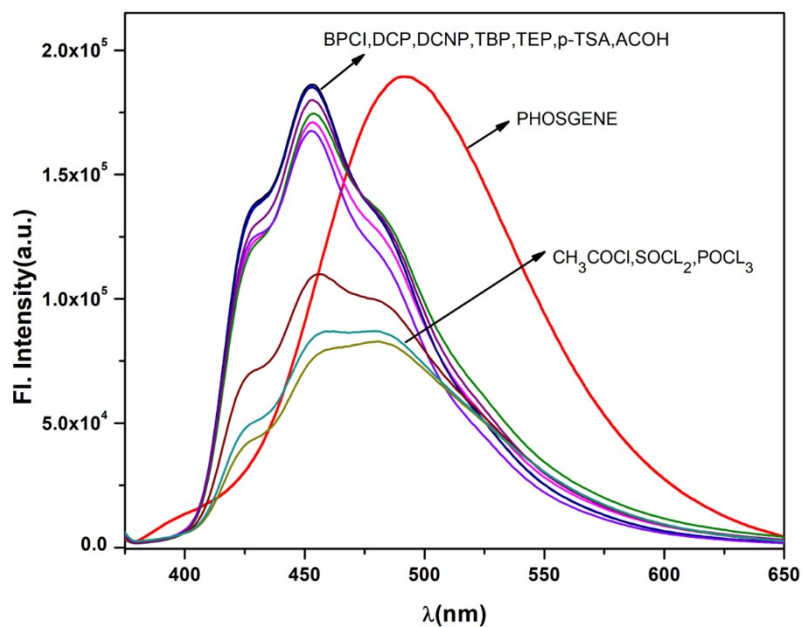

**Figure S3:** Change in emission spectra of BPCI (10  $\mu$ M) in presence of different guest analytes (20  $\mu$ M) in THF solution.

### 3. Competition study

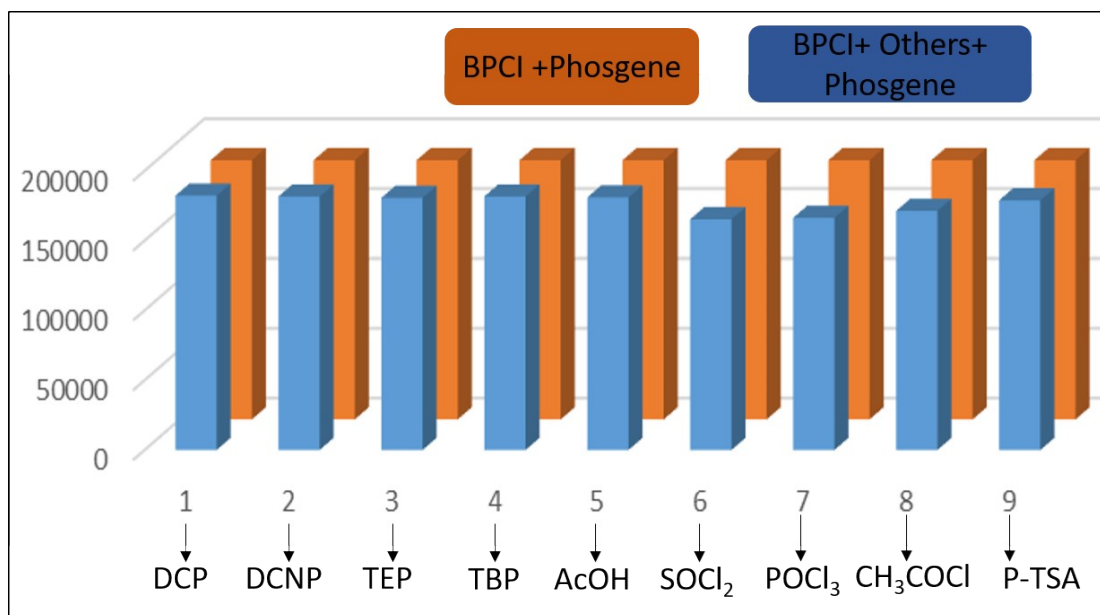

**Figure S4:** A comparative study of emission intensity (at 490 nm) after the addition of different analytes in the solution of BPCI in the presence of phosgene.

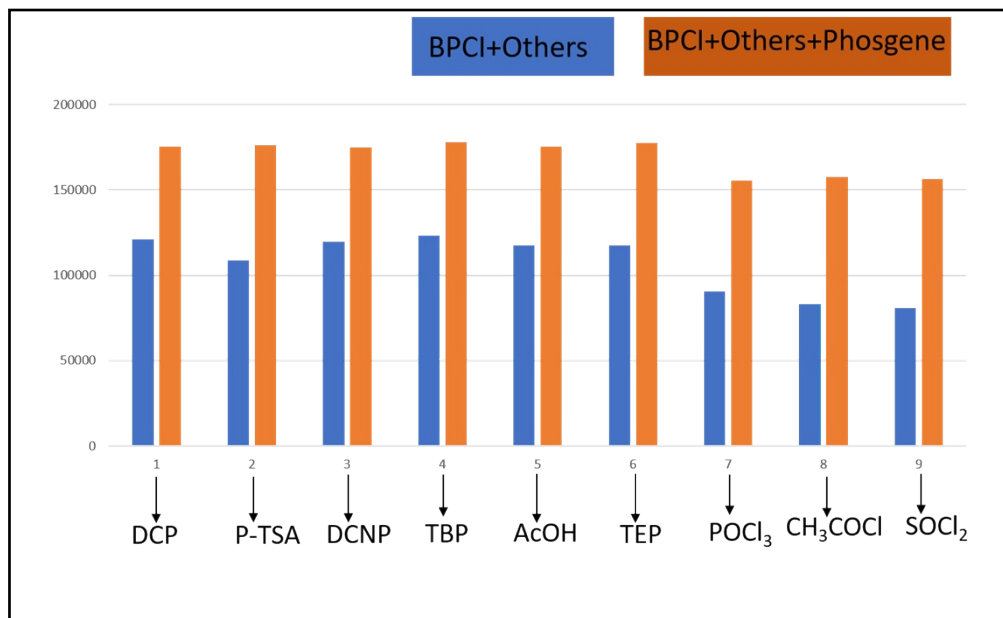

**Figure S5:** A comparative study of emission intensity (at 490 nm) after the addition of phosgene in the solution of BPCI in the presence of different analytes.

#### 4. Determination of Quantum yield of BPCI

For measurement of the quantum yields of BPCI and its reaction product with Phosgene (BPCI-PHOS), we recorded the absorbance of the compounds in THF solution. The emission spectra were recorded using the maximal excitation wavelengths and the integrated areas of the emission-corrected spectra were measured. The quantum yields were then calculated by comparison with coumarin 153 ( $\phi_s = 0.544$ ) as reference using the following equation:

$$\phi_x = \phi_s \times \left( \frac{I_x}{I_s} \right) \times \left( \frac{A_s}{A_x} \right) \times \left( \frac{n_x}{n_s} \right)^2$$

Where, x & s indicate the unknown and standard solution respectively,  $\Phi$  is the quantum yield, I is the integrated area under the fluorescence spectra, A is the absorbance and n is the refractive index of the solvent. We calculated the quantum yields of BPCI and BPCI-PHOS using the above equation and the values are 0.182 and 0.291 respectively.

**Table S1:** Fluorescence lifetime data

| THF (solvent) | Quantum yield ( $\phi$ ) | $\tau$ (ns) | $k_r$ ( $10^8 \times s^{-1}$ ) | $k_{nr}$ ( $10^8 \times s^{-1}$ ) |
|---------------|--------------------------|-------------|--------------------------------|-----------------------------------|
| BPCI          | 0.182                    | 0.946       | 1.92                           | 8.58                              |
| BPCI-PHOS     | 0.291                    | 1.445       | 2.01                           | 4.91                              |

## 5. $^1\text{H}$ NMR spectrum of BPCI

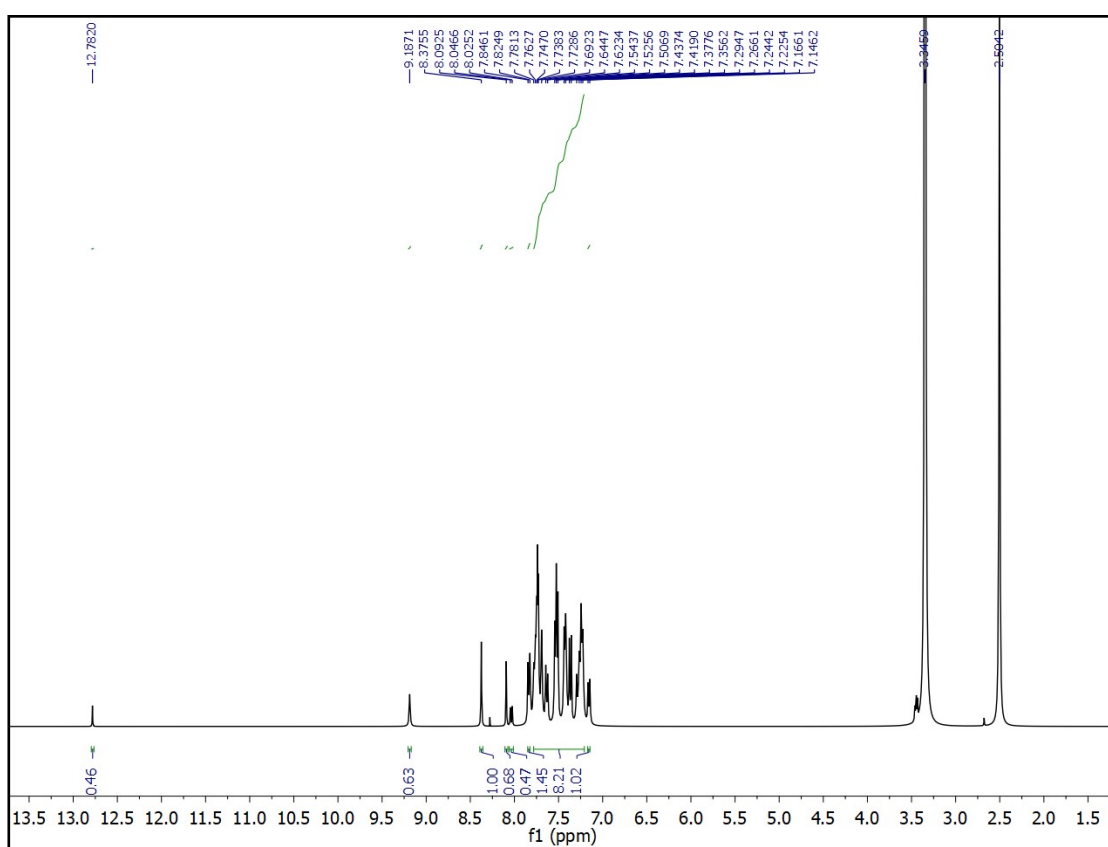**Figure S6:**  $^1\text{H}$  NMR (400 MHz) spectrum of the probe (BPCI) in  $\text{DMSO-d}_6$ .

## 6. $^{13}\text{C}$ NMR spectrum of BPCI

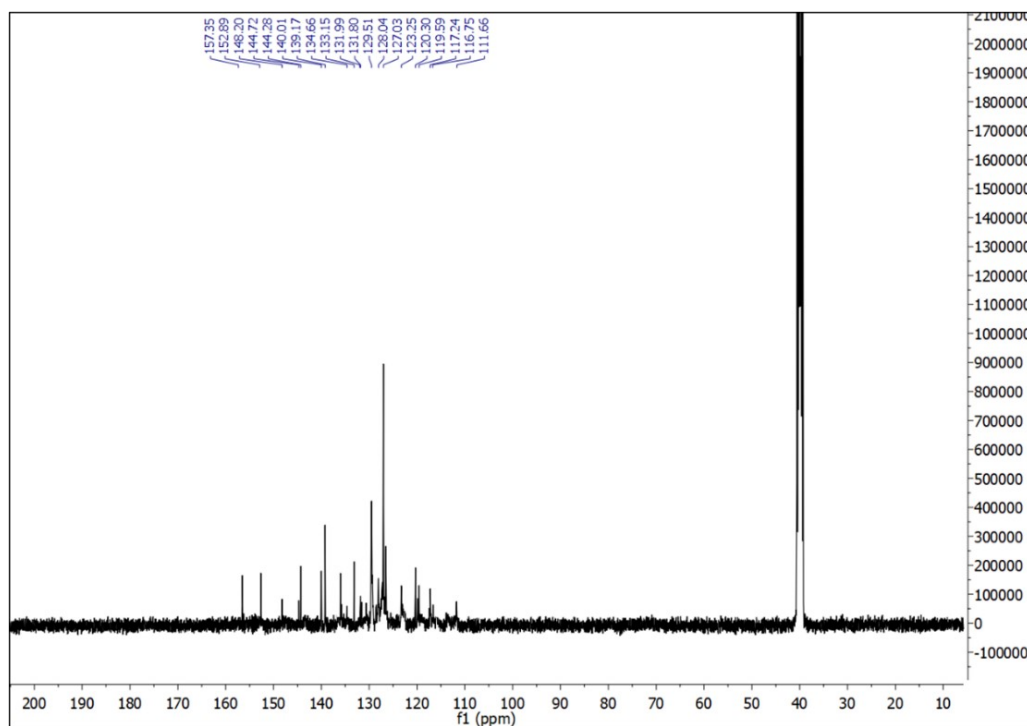

Figure S7:  $^{13}\text{C}$  NMR (100 MHz) spectrum of the probe (BPCI) in DMSO- $\text{d}_6$

## 7. Mass spectrum (HRMS) of BPCI

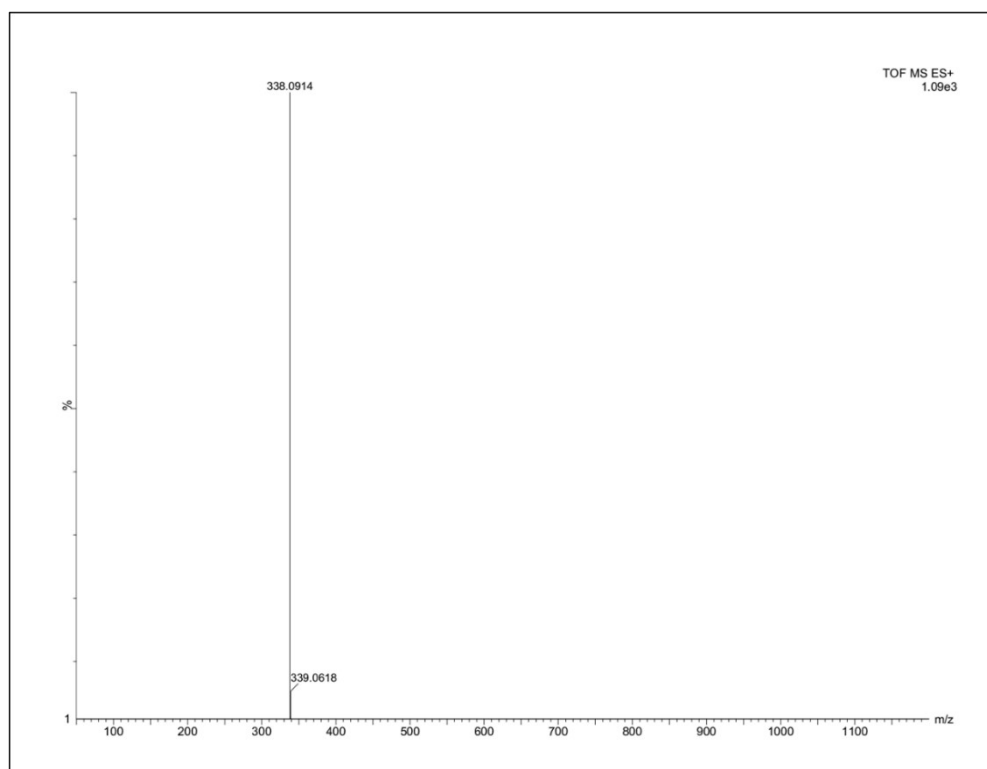

Figure S8: HRMS of the probe (BPCI).

## 8. IR spectra of probe BPCI

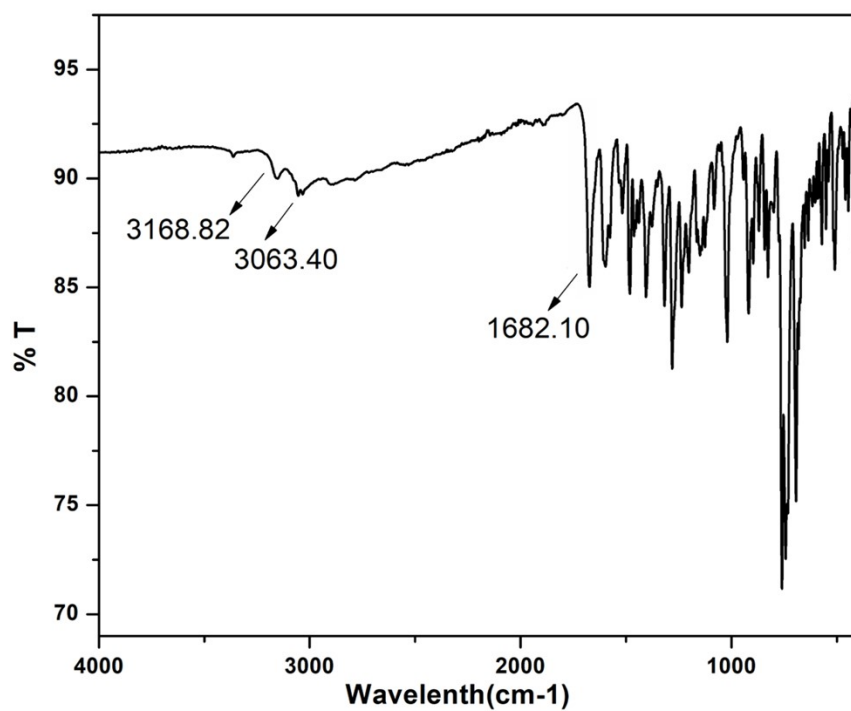

Figure S9: IR spectra of the probe BPCI (KBr disk).

## 9. <sup>1</sup>H NMR spectrum of BPCI-PHOS

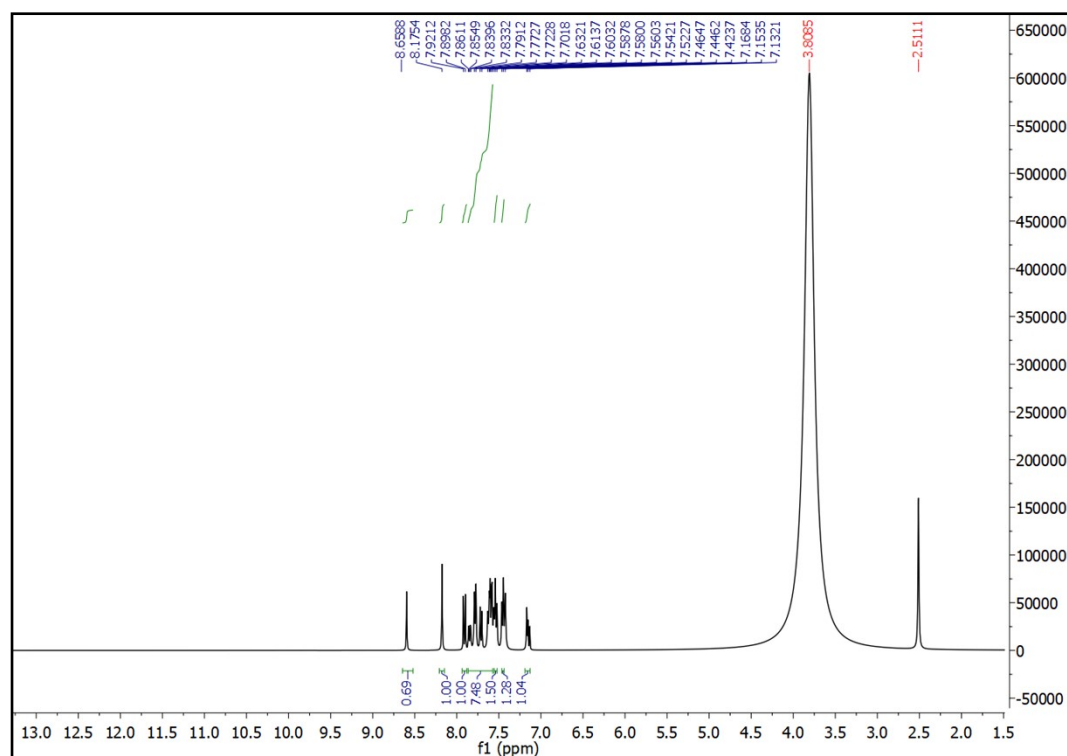

Figure S10: <sup>1</sup>H NMR (400 MHz) spectrum of the BPCI-PHOS in DMSO-d<sub>6</sub>

## 10. $^{13}\text{C}$ NMR spectrum of BPCI-PHOS

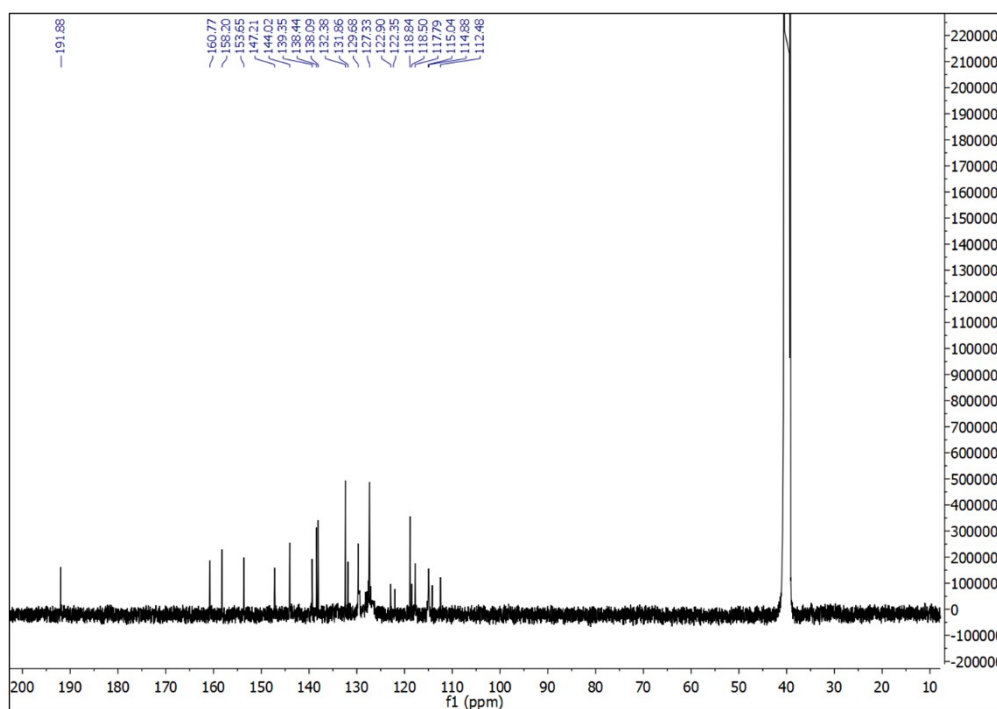

Figure S11:  $^{13}\text{C}$  NMR (100 MHz) spectrum of the BPCI-PHOS in  $\text{DMSO-d}_6$

## 11. Mass spectrum (HRMS) of BPCI-PHOS

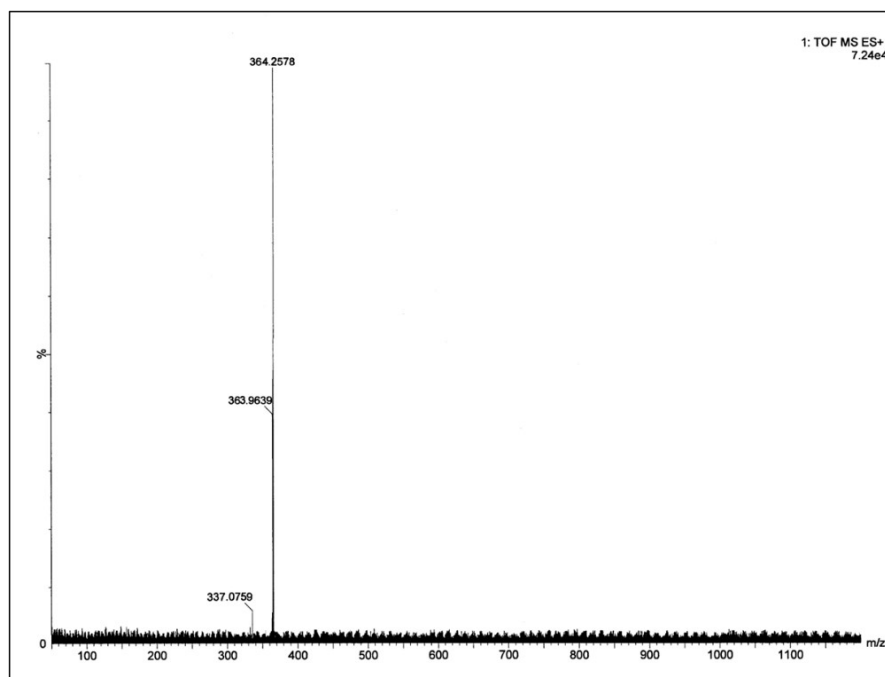

Figure S12: HRMS of BPCI-PHOS.

## 12. Computational Study

**Figure S13:** Contour plots of some selected molecular orbitals of BPCI

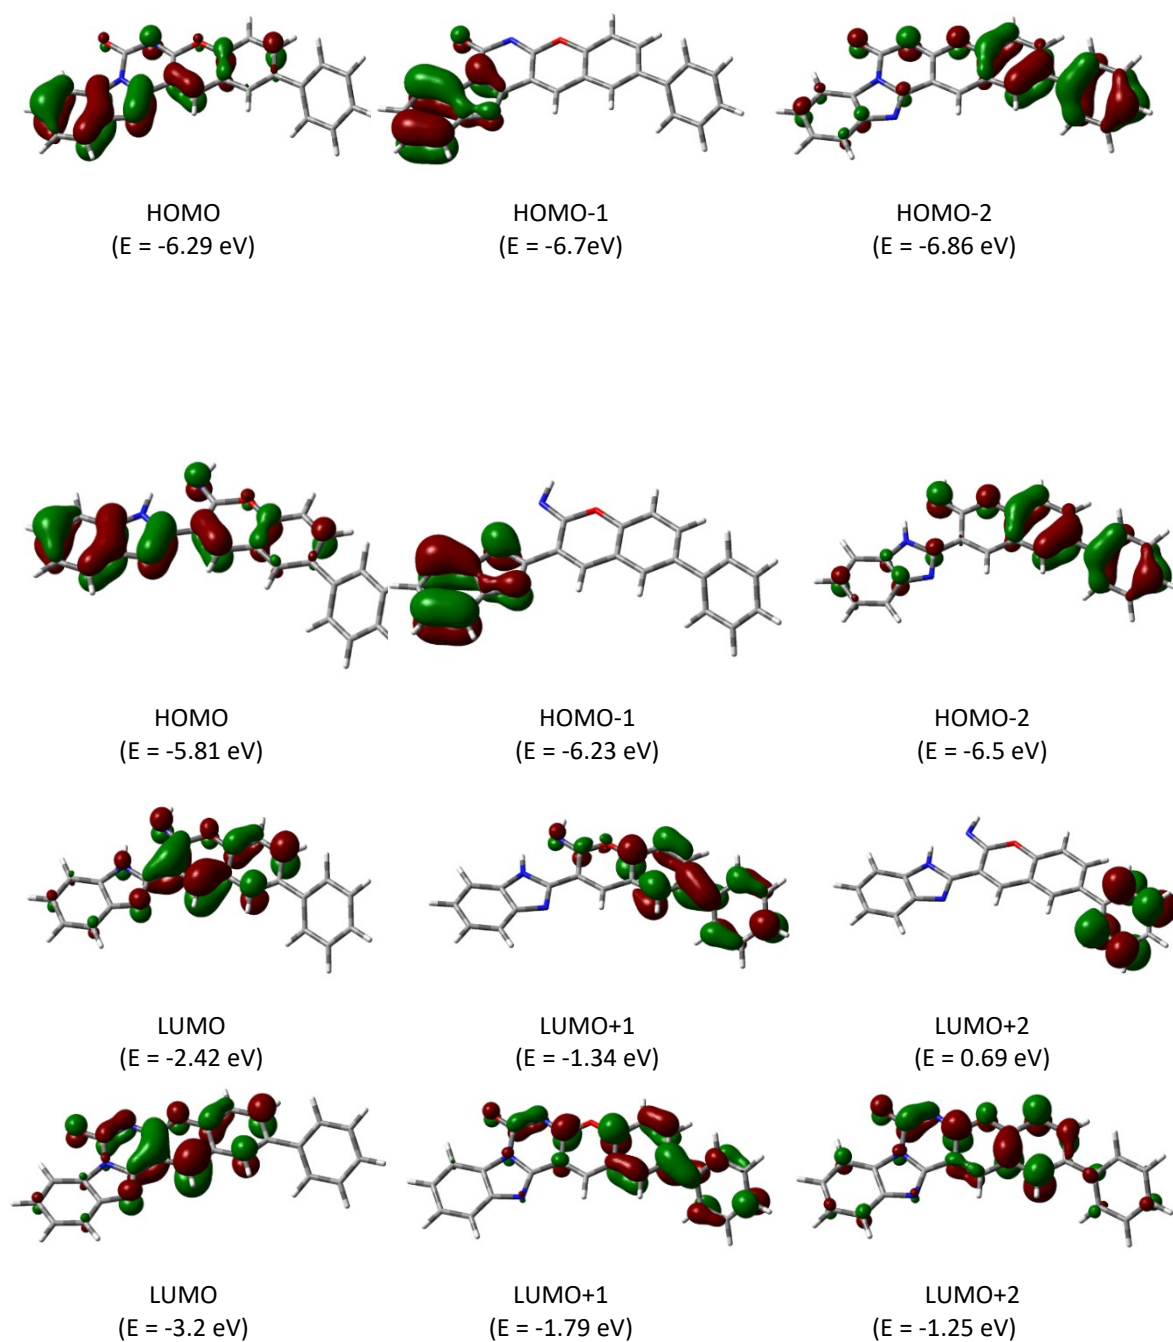

**Figure S14:** Contour plots of some selected molecular orbitals of BPCI-PHOS

**Table S2:** Vertical electronic transition of BPCI and BPCI-PHOS calculated by TDDFT/CPCM method

| Compd.    | Wavelength<br>(nm) | Energy (eV) | Osc.<br>Strength (f) | Key transitions   | Character             |
|-----------|--------------------|-------------|----------------------|-------------------|-----------------------|
| BPCI      | 399.7              | 3.1014      | 0.7762               | (98%) HOMO→LUMO   | $\pi\rightarrow\pi^*$ |
|           | 351.7              | 3.5249      | 0.1367               | (61%) HOMO-1→LUMO | $\pi\rightarrow\pi^*$ |
|           | 354..3             | 3.4990      | 0.0102               | (59%) HOMO-2→LUMO | $\pi\rightarrow\pi^*$ |
|           | 296.4              | 4.6850      | 0.0274               | (58%) HOMO→LUMO+1 | $\pi\rightarrow\pi^*$ |
| BPCI-PHOS | 439.9              | 2.8179      | 0.6757               | (98%) HOMO→LUMO   | $\pi\rightarrow\pi^*$ |
|           | 406.2              | 3.0521      | 0.0135               | (94%) HOMO-1→LUMO | $\pi\rightarrow\pi^*$ |
|           | 388.9              | 3.1879      | 0.0431               | (94%) HOMO-2→LUMO | $\pi\rightarrow\pi^*$ |
|           | 296.5              | 3.1813      | 0.1388               | (75%) HOMO→LUMO+1 | $\pi\rightarrow\pi^*$ |

### 13. Comparison table:

**Table S3:** The comparison of the present probe (BPCI) with some previous probes for detection of phosgene

| Receptor                                                                            | Type of response                         | Test kit                | Detection limit | Detection in gaseous phase | Reference                                             |
|-------------------------------------------------------------------------------------|------------------------------------------|-------------------------|-----------------|----------------------------|-------------------------------------------------------|
| 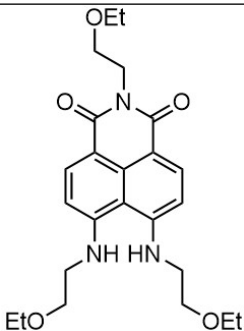 | Fluorometric (ratiometric)               | Yes (Test-strip method) | 1.3 nM          | Yes                        | <i>Chem. Commun.</i> , 2017, <b>53</b> (9), 1530-1533 |
| 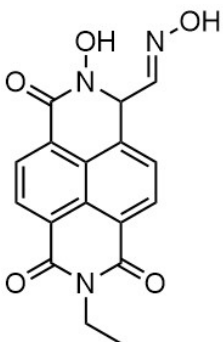 | Colorimetric, fluorometric (ratiometric) | Yes (Test-strip method) | 0.09 nM         | Yes                        | <i>J. Mater. Chem. A.</i> , 2019, <b>7</b> (4),       |



|  |  |                       |  |  |  |
|--|--|-----------------------|--|--|--|
|  |  | Test-strip<br>method) |  |  |  |
|--|--|-----------------------|--|--|--|
